# Supplementary material for: L-Rhamnosylation of Listeria monocytogenes Wall Teichoic Acids Promotes Resistance to Antimicrobial Peptides by Delaying Interaction with the Membrane
Source: PubMed Central journal article supplement (PMC4441387; doi:10.1371/journal.ppat.1004919), 2015-05-22
Supplement: ppat.1004919.s001.pdf [file ppat.1004919.s001.pdf]

**A**

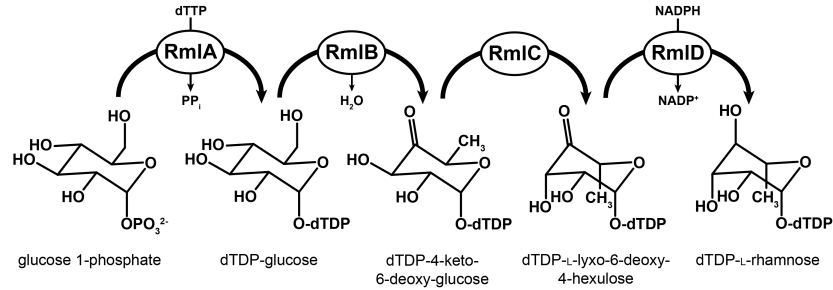

**B**

```

Bsu_GgaB  - - - - - MNEKSFNYDFS VIMPIYNVELY-LTEAIESIINQTIGFE 38
Lmo_RmlT  MRNLKDRVLSLSKGNKKDKIKIS VVVPTYNTELEGLKNLMASIDKQTMNP 50

Bsu_GgaB  NIQLILVNDSDPKSEIICKEYAQKYPNNIVYAKKQNGGVSSARNYGLKY 88
Lmo_RmlT  EYELVVFVDDGSTTDTYERLQEF AETRPNMTVKQIENSGWGSRRPRNIATKM 100

Bsu_GgaB  AEGRYIQFLDDDDLVSEGTFFENVLNFDFDEHKNEIDIVAIPFFAEGRTGE 138
Lmo_RmlT  AKGEYILYLDDDDTVFPETFERVYNFGKENN--LDVVSGKEVRTNGWSWG 148

Bsu_GgaB  HNLNKFSSSTRILDVEKEPHHLLTHCCSTFIKKDALKN--IRFDENCKIG 186
Lmo_RmlT  ---WKQFSENNPHAEEMGIECLLPMPHPKFKYKREFLENDITFDDDGARVL 195

Bsu_GgaB  -EDAKLVNLIISQKKKYGLVKEAKYHYRVREDGSSAMQTAKANKNWFNHS 235
Lmo_RmlT  WEDVYFNSKAFIHGAKVGLADYPTYWYIATGANNSSSFGRDPHEKWNQI 245

Bsu_GgaB  -LITFSKNLIDIKNHEQKIPFLFQYVMVMDLKWKLLIKDISETPLDEN 283
Lmo_RmlT  NKLFNFFKDNIKEQRDLDFMLTHWYRSRVLGILGQWLLKNNNERIDIEFN 295

Bsu_GgaB  EYSEFLTIREVLSYIDDDVIEETKSVSHFYLYHALKIKHGENYSRYVYE 333
Lmo_RmlT  -----YAKKLAEELIPAYISENLD 314

Bsu_GgaB  RETEQDYLYREG--KIVSKLSDQTLTIEILEENEDSIHIEGFWSSLFNS 381
Lmo_RmlT  KNNQVKDYLLRQGDLDLSLKKLAQIDAGITALSYVEDAYFKE--DKLFFK 361

Bsu_GgaB  KGFKFYAKIGETKIKAKNIKRQNDYISLGEVIKKYPGFSIDIPKGLHAD 431
Lmo_RmlT  TSTKMTYEDKEDFFIEKTADRMER--ILPEEIKSKLPKEFFDYSD-DLAE 408

Bsu_GgaB  NHHIEFFITKGKKRKLTKLRFKYSGLSNDLYNTYVAKKDYIFYNYKKL 481
Lmo_RmlT  FTYEPSIKGRNSRATWKIDGSTSNVEVVNKKANLYKIEGEMSFVSQINDY 458

Bsu_GgaB  MFKKNNFKNRFIKEFRFLKSLHKSGEKSKKRKSAIKKALMARMVHHVFTI 531
Lmo_RmlT  ILDAADKKQPWDIATRFTGLGYTSHRALTIGKILIKTALIN--NKTMIV 505

Bsu_GgaB  FNRKPVWLFIDRQDKADDNAEHLFKYAINKNDGVKKYFIIKKDSKDYDR 581
Lmo_RmlT  YKNASGLISLDVGS SVRS-----IVEDSGVKREQUILIDKTSG 542

Bsu_GgaB  KKYGKVIPYRSFRHKILTLSSSKVISTHADIWVVNPPFNMEIFYRDLFNF 631
Lmo_RmlT  -----KVTIPLNEIHVFGESLIEG 561

Bsu_GgaB  EFIFLQHGITMADHSEWLNKYNKNIKLLVTSAPPEYRSIVKGNYNKKEN 681
Lmo_RmlT  NAELKPVGISDADP-----INVKAKLIGEANKARVEVLLG 598

Bsu_GgaB  ILLGGFPYDNLKKSEGEKQLLIMPTWRKDIVLPKDAQGVRPYNPKFKD 731
Lmo_RmlT  KLSGEYHLVTNIQGGKDKQKQIKITL----- 623

Bsu_GgaB  SEYFSRYNALINDERLIEFAKKNYKITFFPHPDIQQQIVDFEKHDYVEF 781
Lmo_RmlT  ----- 623

Bsu_GgaB  ADYNSSYQMLFNSSNIMITDFSSVAFDFAYEKKPVIIYYQYEKSYHFKLDY 831
Lmo_RmlT  ----- 623

Bsu_GgaB  YDYKKMGFGDVLENHNSLVDKVIYYMKNNSRMEDKYRKRVDNFFAYTDKN 881
Lmo_RmlT  ----- 623

Bsu_GgaB  NRNRIYNAILELDNNKVAK 900
Lmo_RmlT  ----- 623

```

Figure S1

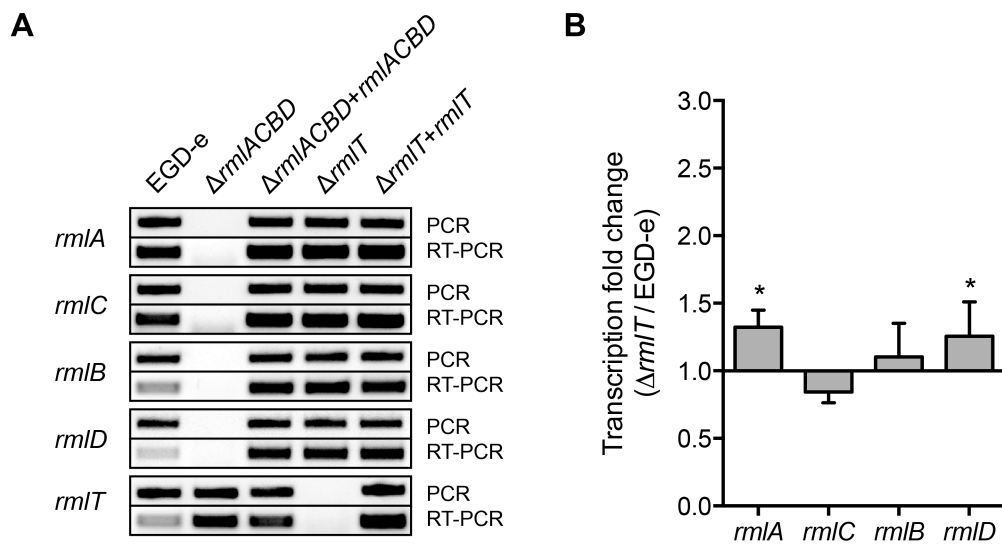

Figure S2

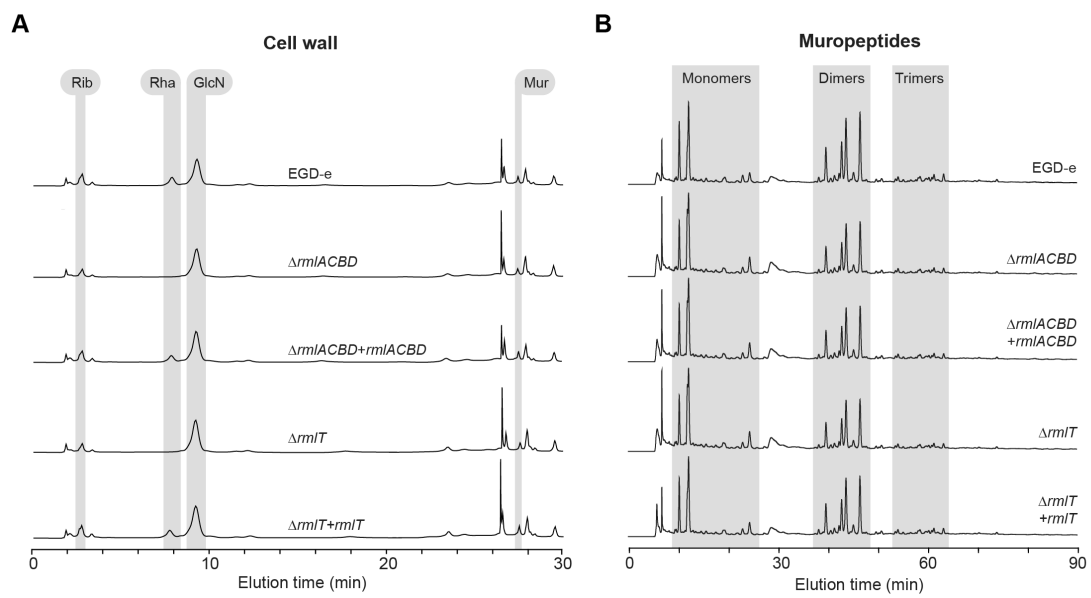

Figure S3

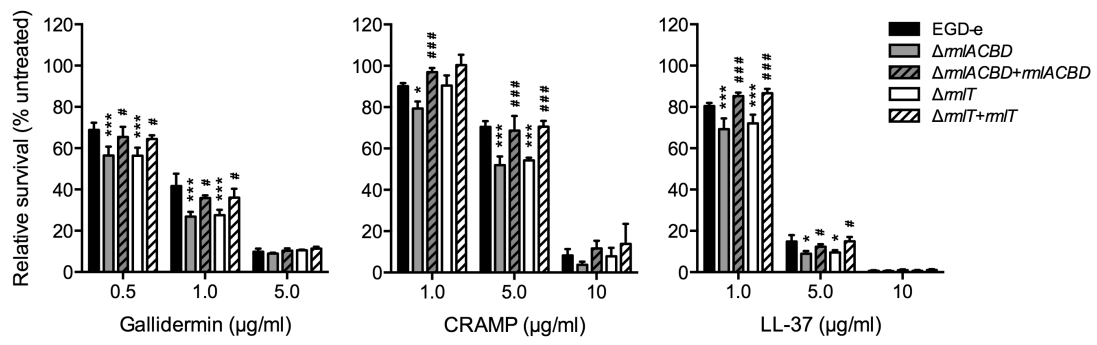

Figure S4

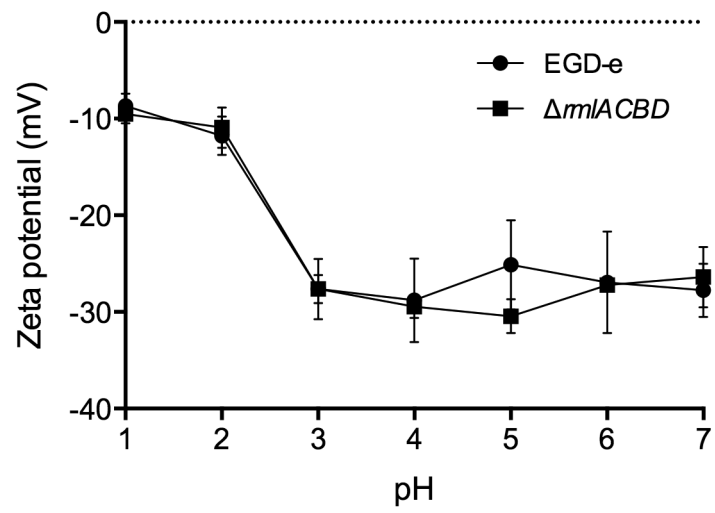

Figure S5

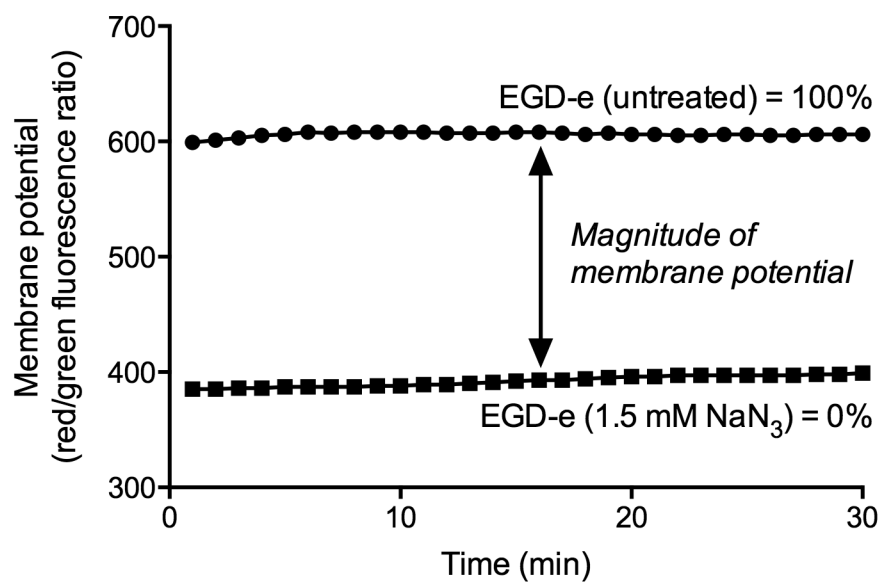

Figure S6

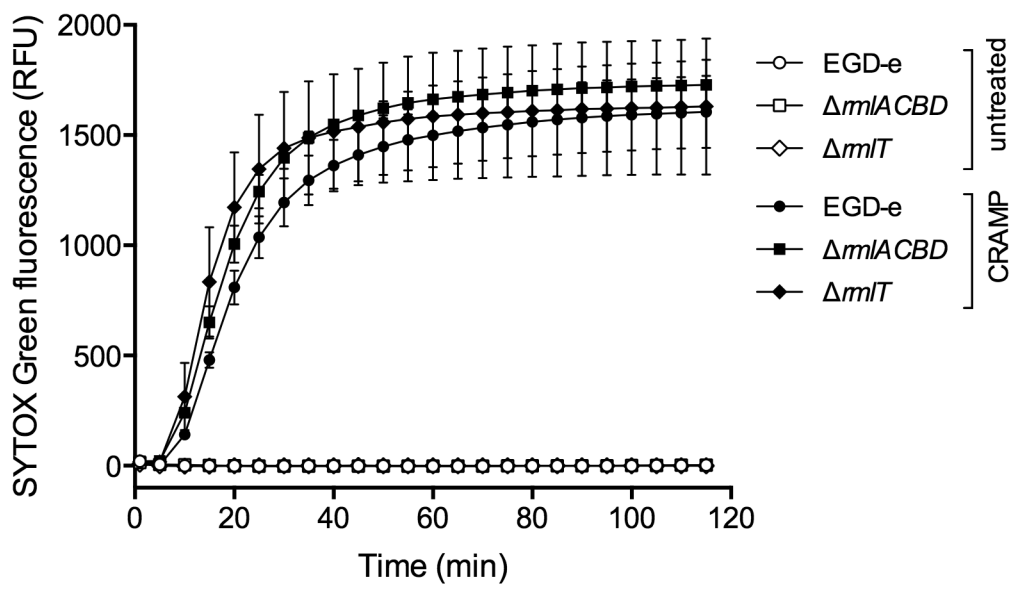

Figure S7

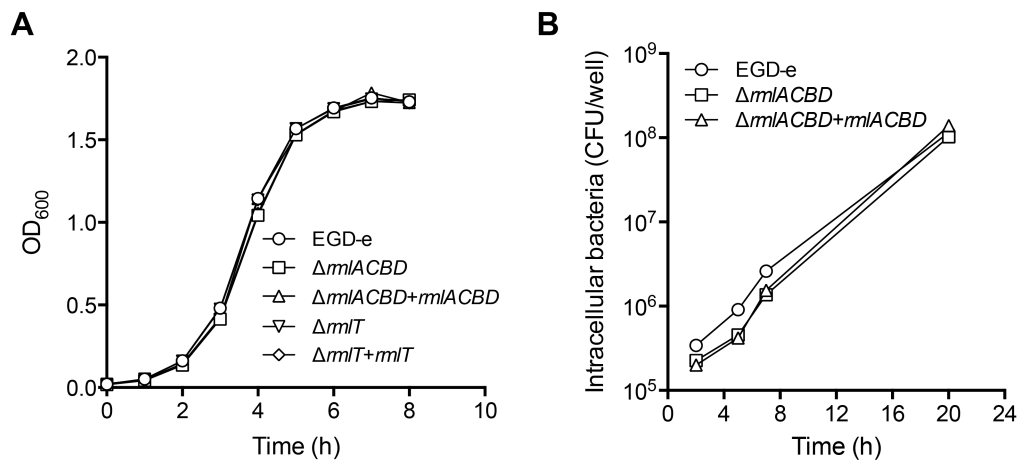

Figure S8



**Table S1. Homology between the RmlACBD proteins of *Ln*EGD-e and other strains and species<sup>a</sup>**

| <b>Species<sup>b</sup> / Strain</b> | <b>Serovar</b> | <b>RmlA</b> | <b>RmlB</b> | <b>RmlC</b> | <b>RmlD</b> |
|-------------------------------------|----------------|-------------|-------------|-------------|-------------|
| <i>Lmo</i> 10403S                   | 1/2a           | 100         | 100         | 100         | 100         |
| <i>Lmo</i> SLCC2755                 | 1/2b           | 100         | 99          | 99.5        | 99.3        |
| <i>Lmo</i> SLCC2372                 | 1/2c           | 100         | 100         | 100         | 100         |
| <i>Lmo</i> SLCC2479                 | 3c             | 100         | 100         | 100         | 100         |
| <i>Lmo</i> SLCC2482                 | 7              | 100         | 98.7        | 99.5        | 99.3        |
| <i>Lse</i> SLCC3954                 | 1/2b           | 97.2        | 95.1        | 98.4        | 92.0        |
| <i>Smu</i> UA159                    |                | 74.6        | 45.7        | 28.6        | 51.6        |
| <i>Mtu</i> H37Rv                    |                | 58.3        | 46.7        | 33.5        | 34.3        |
| <i>Sen</i> LT2                      |                | 68.4        | 51.8        | 46.4        | 34.8        |
| <i>Sfl</i> 2457T                    |                | 70.8        | 51.5        | 48.0        | 35.9        |
| <i>Pae</i> PAO1                     |                | 69.1        | 52.4        | 47.2        | 32.2        |

<sup>a</sup>Values in percentage of amino acid identity determined by protein-protein BLAST analysis

<sup>b</sup>*Lmo*, *Listeria monocytogenes*; *Lse*, *Listeria seeligeri*; *Smu*, *Streptococcus mutans*; *Mtu*, *Mycobacterium tuberculosis*; *Sen*, *Salmonella enterica* serovar Typhimurium; *Sfl*, *Shigella flexneri*; *Pae*, *Pseudomonas aeruginosa*

**Table S2. Primers**

| #                                                       | Name                 | Sequence (5' to 3') <sup>a</sup>     |
|---------------------------------------------------------|----------------------|--------------------------------------|
| <i>Construction of plasmids and screening of clones</i> |                      |                                      |
| 1                                                       | <i>rmlA</i> -A       | TACGTCGACTGCTCAAATCGATGCTGG          |
| 2                                                       | <i>rmlA</i> -B       | CGACGCGTCATTCTTTTCTCTCC              |
| 3                                                       | <i>rmlD</i> -C       | ATACGCGTTTGGCAAGATGCTTTAGTTCCG       |
| 4                                                       | <i>rmlD</i> -D       | ATTAGATCTTAGTGGTCTCCACCAAGC          |
| 5                                                       | <i>rmlA</i> -F       | GGCTACCACGTGAATGATCC                 |
| 6                                                       | <i>rmlA</i> -R       | AACTCACCACGTTTCAGATGG                |
| 7                                                       | <i>rmlB</i> -F       | GCAGCAGAATCTCATGTAGACC               |
| 8                                                       | <i>rmlB</i> -R       | CCAGTTTCTCCAAGTGAACC                 |
| 9                                                       | <i>rmlC</i> -F       | ACATACGGTGAGTGGGAAGG                 |
| 10                                                      | <i>rmlC</i> -R       | AATCCGGATCATCGTAGGC                  |
| 11                                                      | <i>rmlD</i> -F       | TGGGAAGTAAACGTGGATGG                 |
| 12                                                      | <i>rmlD</i> -R       | CCAAACACCCATGAAGTACG                 |
| 13                                                      | <i>rmlA</i> -G       | ATACTATGCGGCCGCTTCATGTGTTTGGTGAAAGC  |
| 14                                                      | <i>rmlD</i> -H       | GCGGTCGACACAATTATACGAATGCATCG        |
| 15                                                      | <i>rmlT</i> -A       | ATAGTCGACCCTAAAGTTAATGGCAAAGCTCCTGC  |
| 16                                                      | <i>rmlT</i> -B       | CGAATTCCATTATATCCTCCTAAAATAGATTAACAG |
| 17                                                      | <i>rmlT</i> -C       | CGAATTCTAAGAATGGAGAGAAAAGAATGAAAGG   |
| 18                                                      | <i>rmlT</i> -D       | ACTAGATCTCAATTTCCATTAGTACGCCTCACTC   |
| 19                                                      | <i>rmlT</i> -F       | TATTGCCACACGCTTTACCG                 |
| 20                                                      | <i>rmlT</i> -R       | CTTCCACGATTGAACGAACG                 |
| 21                                                      | <i>rmlT</i> -G       | TATCTGCAGGAGGGAAAACGTTAGGTAGC        |
| 22                                                      | <i>rmlT</i> -H       | GCGGTCGACCTAGTTCCTCCTCCTGC           |
| 23                                                      | PL95                 | ACATAATCAGTCCAAAGTAGATGC             |
| 24                                                      | PL102                | TATCAGACCTAACCCAAACCTTCC             |
| <i>Quantitative real-time PCR</i>                       |                      |                                      |
| 25                                                      | qPCR- <i>rmlA</i> -F | TTCTTGAAGCGTCTACCT                   |
| 26                                                      | qPCR- <i>rmlA</i> -R | GCAGCCTCATCAATATACC                  |
| 27                                                      | qPCR- <i>rmlB</i> -F | GTAGACCGTAGTATTATCAATCC              |
| 28                                                      | qPCR- <i>rmlB</i> -R | TCTCCAAGTGAACCATAACA                 |
| 29                                                      | qPCR- <i>rmlC</i> -F | TATTCAAGATAACCACTC                   |
| 30                                                      | qPCR- <i>rmlC</i> -R | TCAACAACACTACATCATAA                 |
| 31                                                      | qPCR- <i>rmlD</i> -F | AGATTCTGTAGATATTGTGGAT               |
| 32                                                      | qPCR- <i>rmlD</i> -R | CATCTTCTGCTGCTTCTA                   |
| 32                                                      | qPCR-16S-F           | GCGTAGATATGTGGAGGAAC                 |
| 33                                                      | qPCR-16S-R           | CAGGCGGAGTGCTTAATG                   |

<sup>a</sup> Restriction sites underlined
